# Supplementary material
Source: PubMed Central journal article supplement (PMC7790887)

# Full unedited gel for Figure 1

**C**

$\alpha$ -SMA

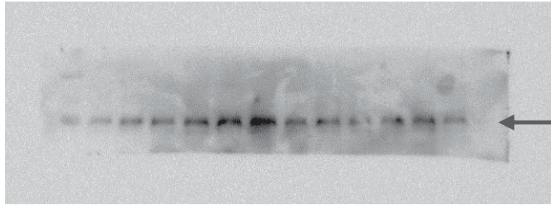

GAPDH

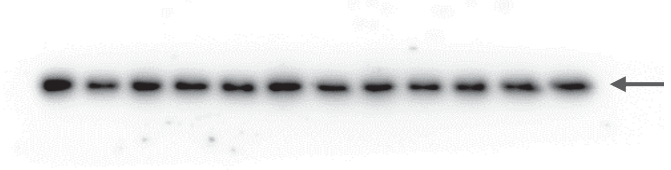

**E**

Bax

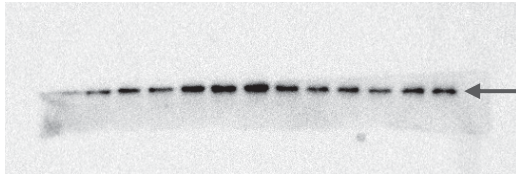

Bcl2

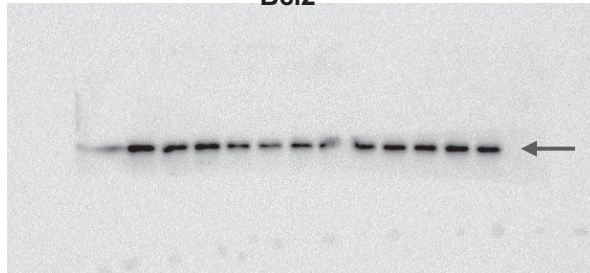

Cl-Caspase 3

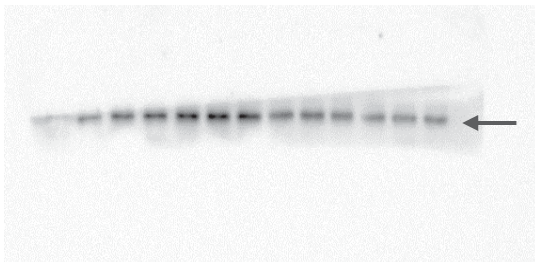

T-Caspase 3

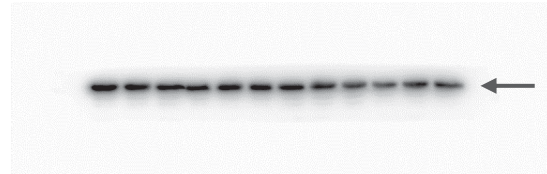

GAPDH

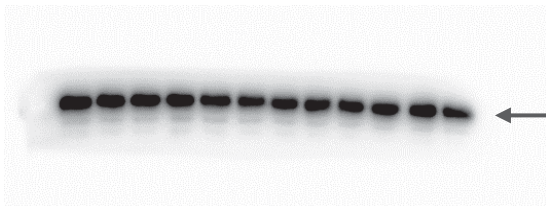

LNA Anti-miR-30d in vivo

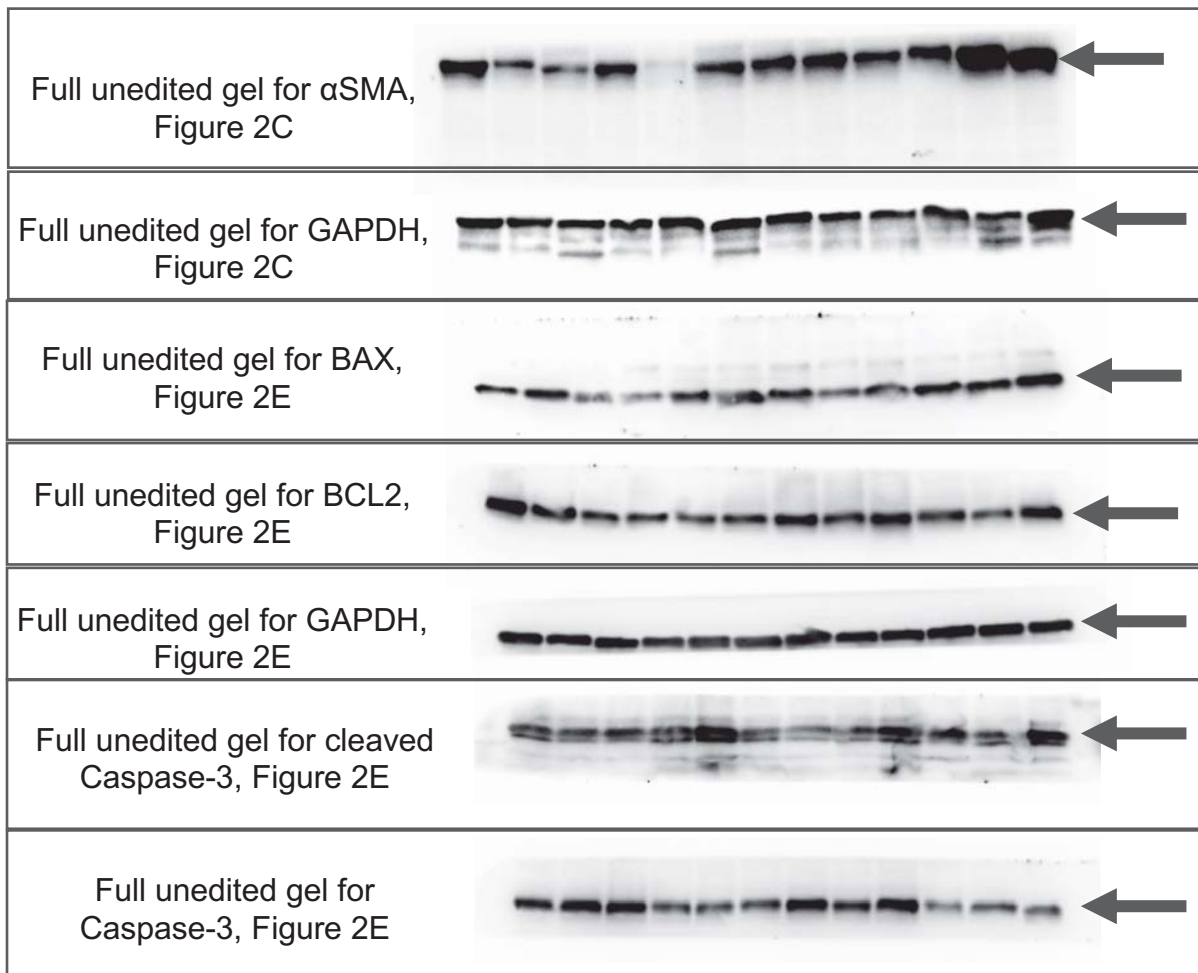

Full unedited gel for Figure 2H

H

Bax

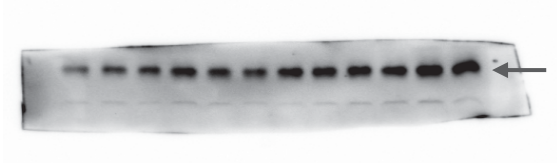

CI-Caspase 3

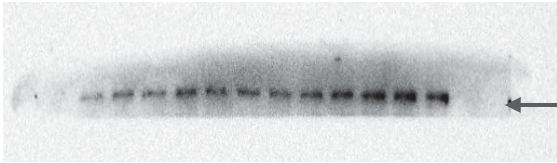

GAPDH

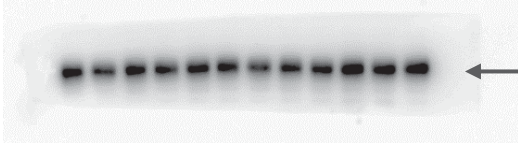

Bcl2

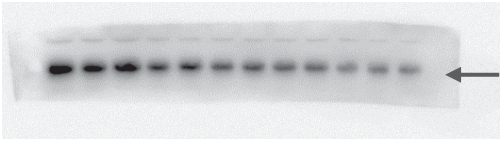

T-Caspase 3

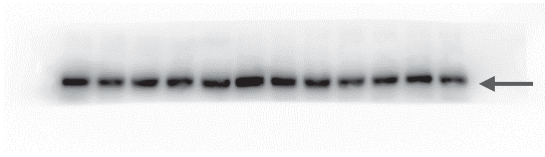

# Full unedited gel for Figure 3

**D**

Bax

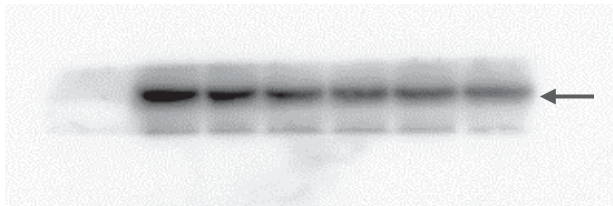

Bcl2

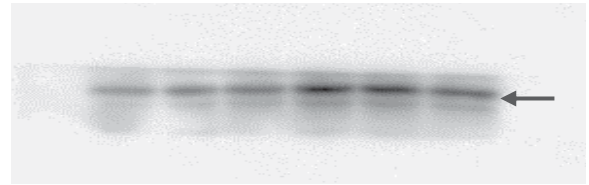

GAPDH

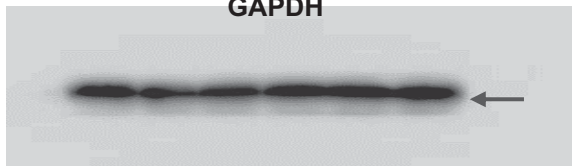

CI-Caspase 3

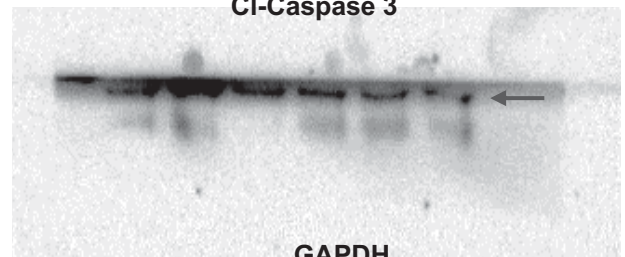

T-Caspase 3

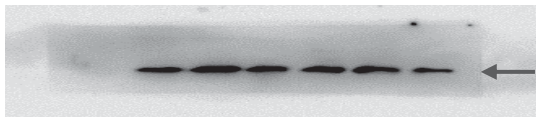

GAPDH

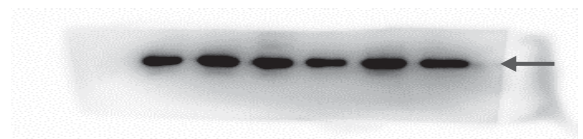

**E**

Bax

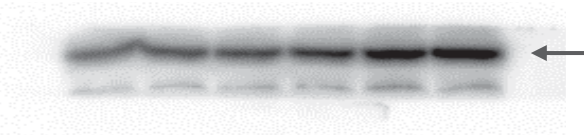

Bcl2

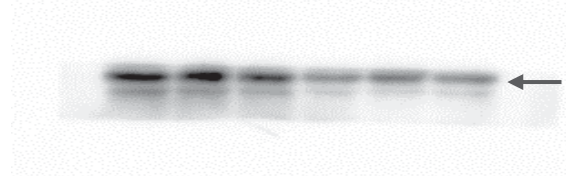

GAPDH

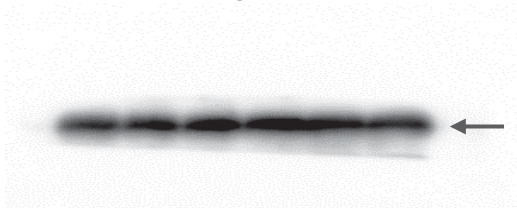

CI-Caspase 3

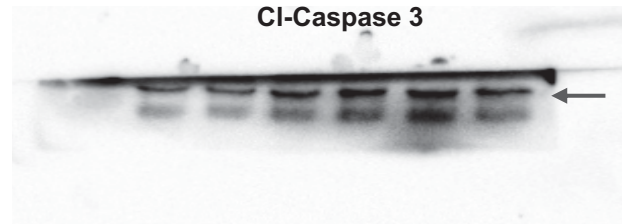

T-Caspase 3

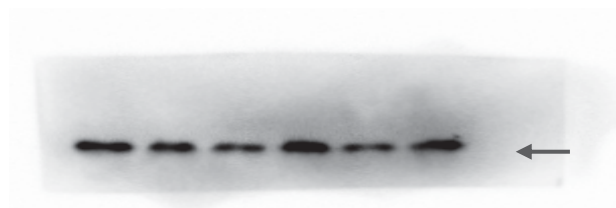

GAPDH

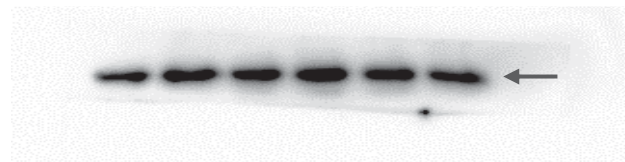

# Full unedited gel for Figure 4

**B**

MAP4K4

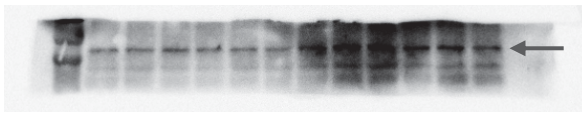

GAPDH

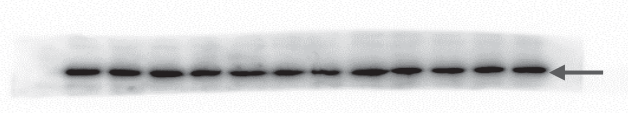

Full unedited gel for MAP4K4,  
Figure 4B

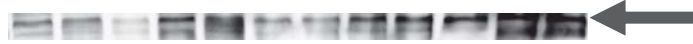

Full unedited gel for GAPDH,  
Figure 4B

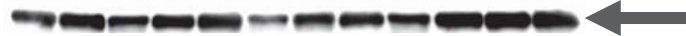

**C**

MAP4K4

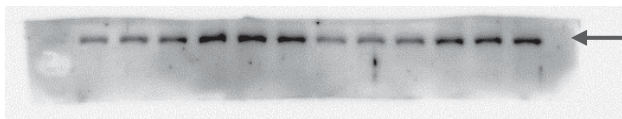

GAPDH

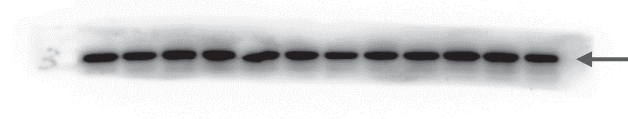

# Full unedited gel for Figure 6

**B**

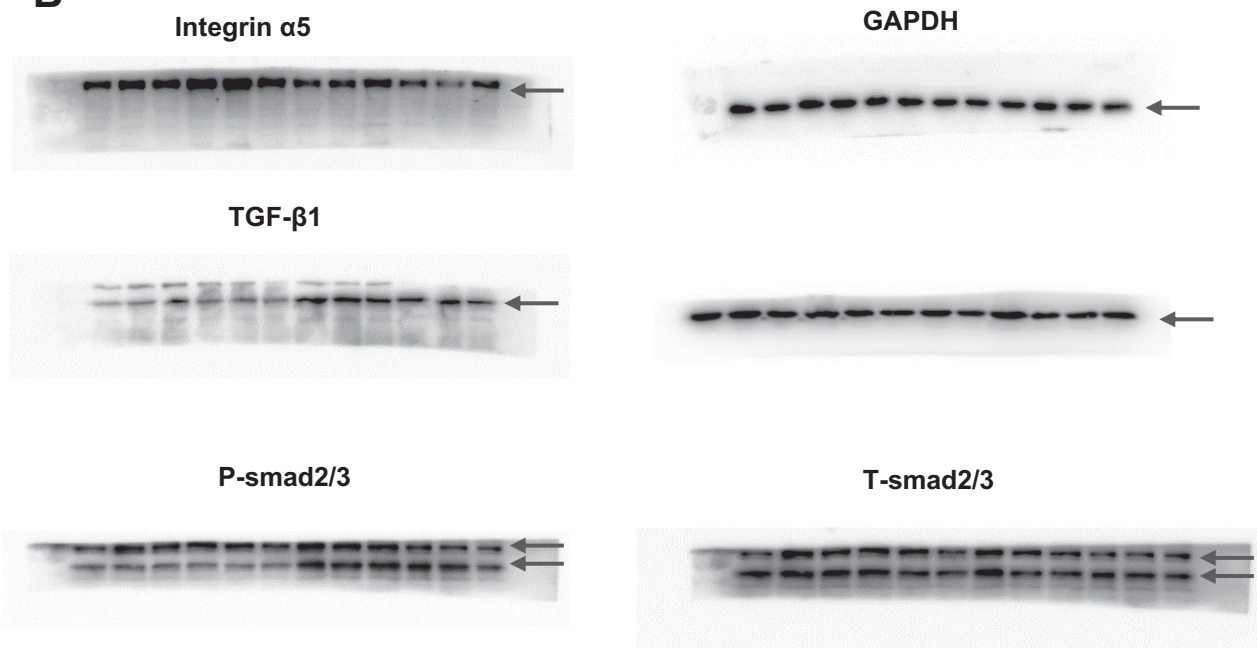

**C**

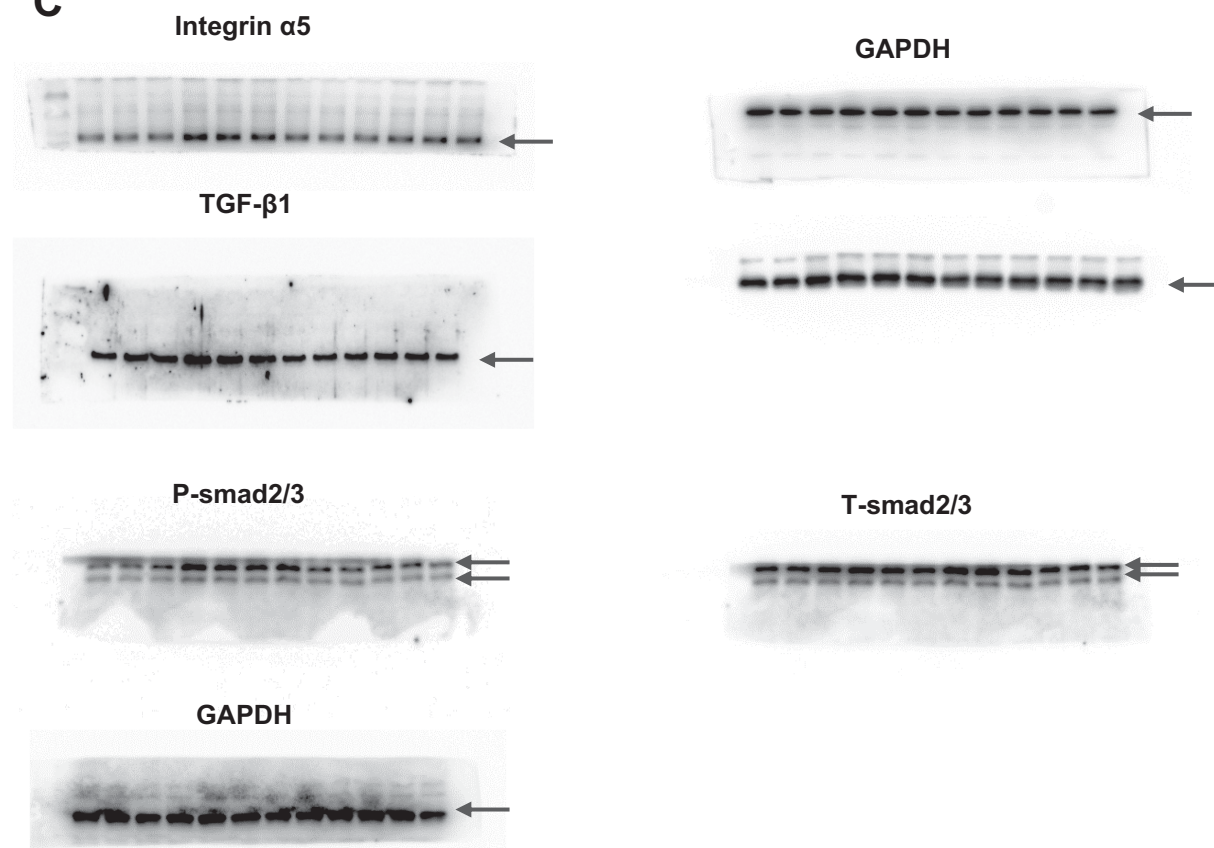

# Unedited gels for Fig. 6D

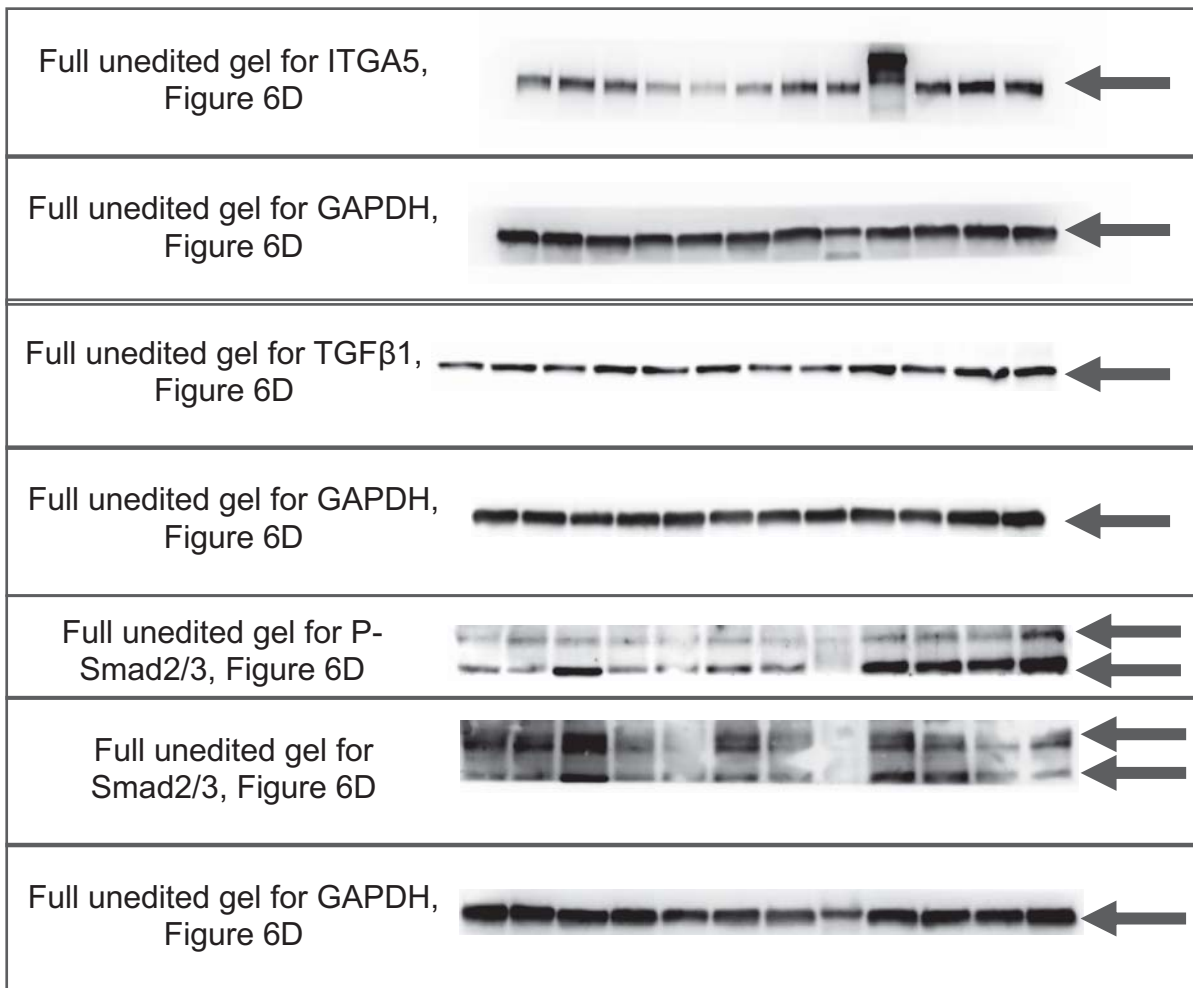

**Full unedited gel in Supplemental Figure IB and Supplemental Figure IIIC**

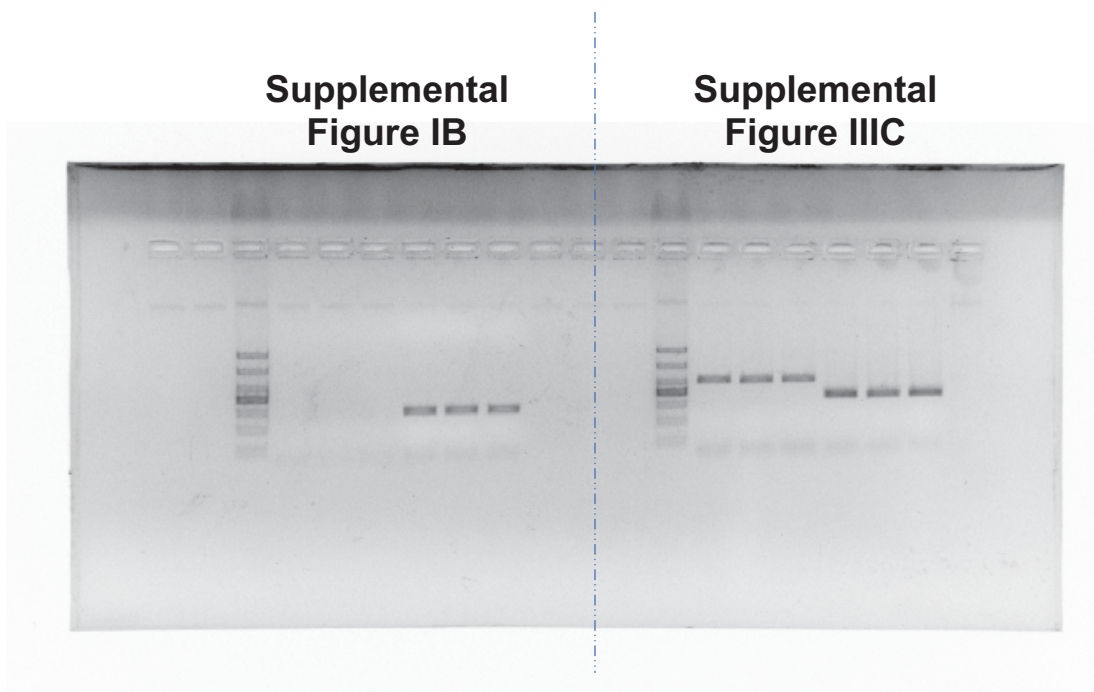



# Full unedited gel for Supplemental Figure II

**A**

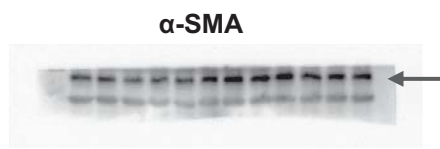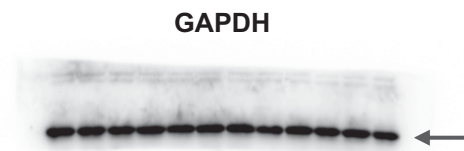

**B**

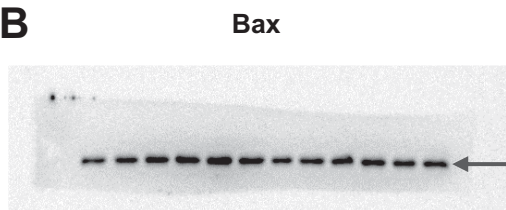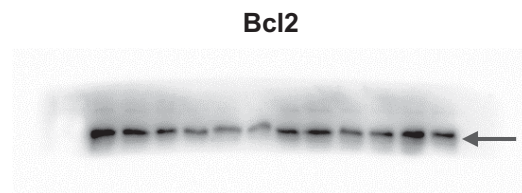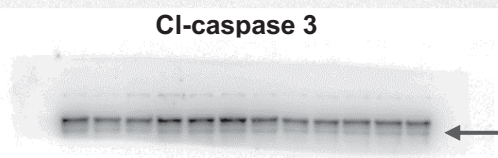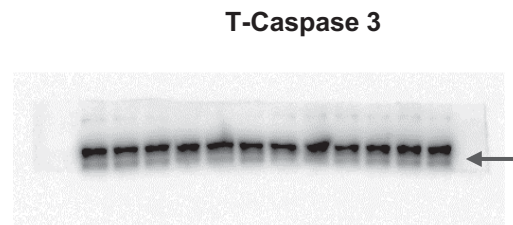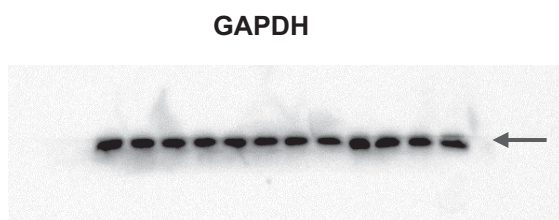

**E**

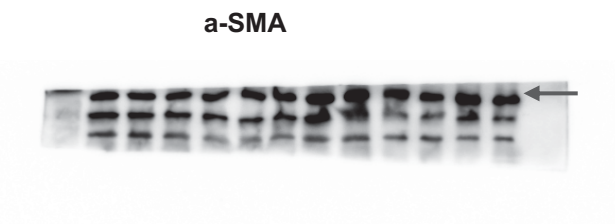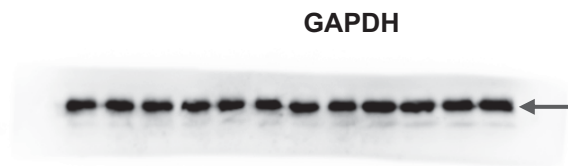

## Full unedited gel in Supplemental Figure VII

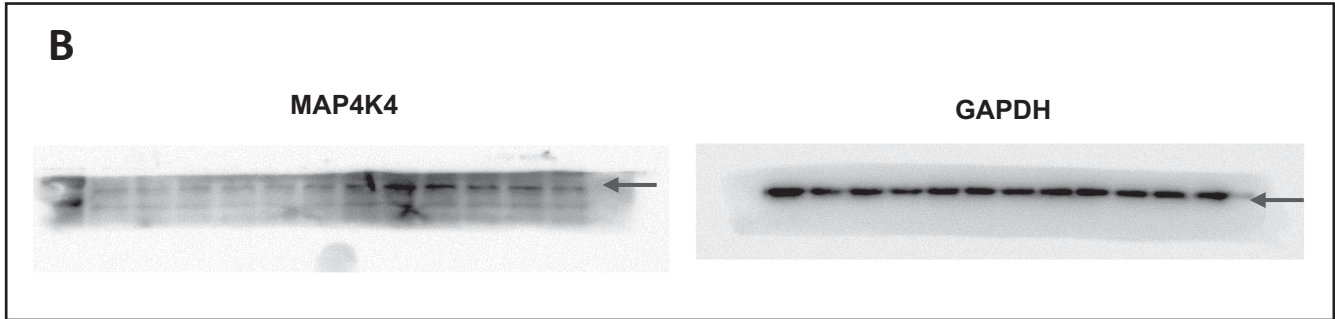

## Full unedited gel in Supplemental Figure IX

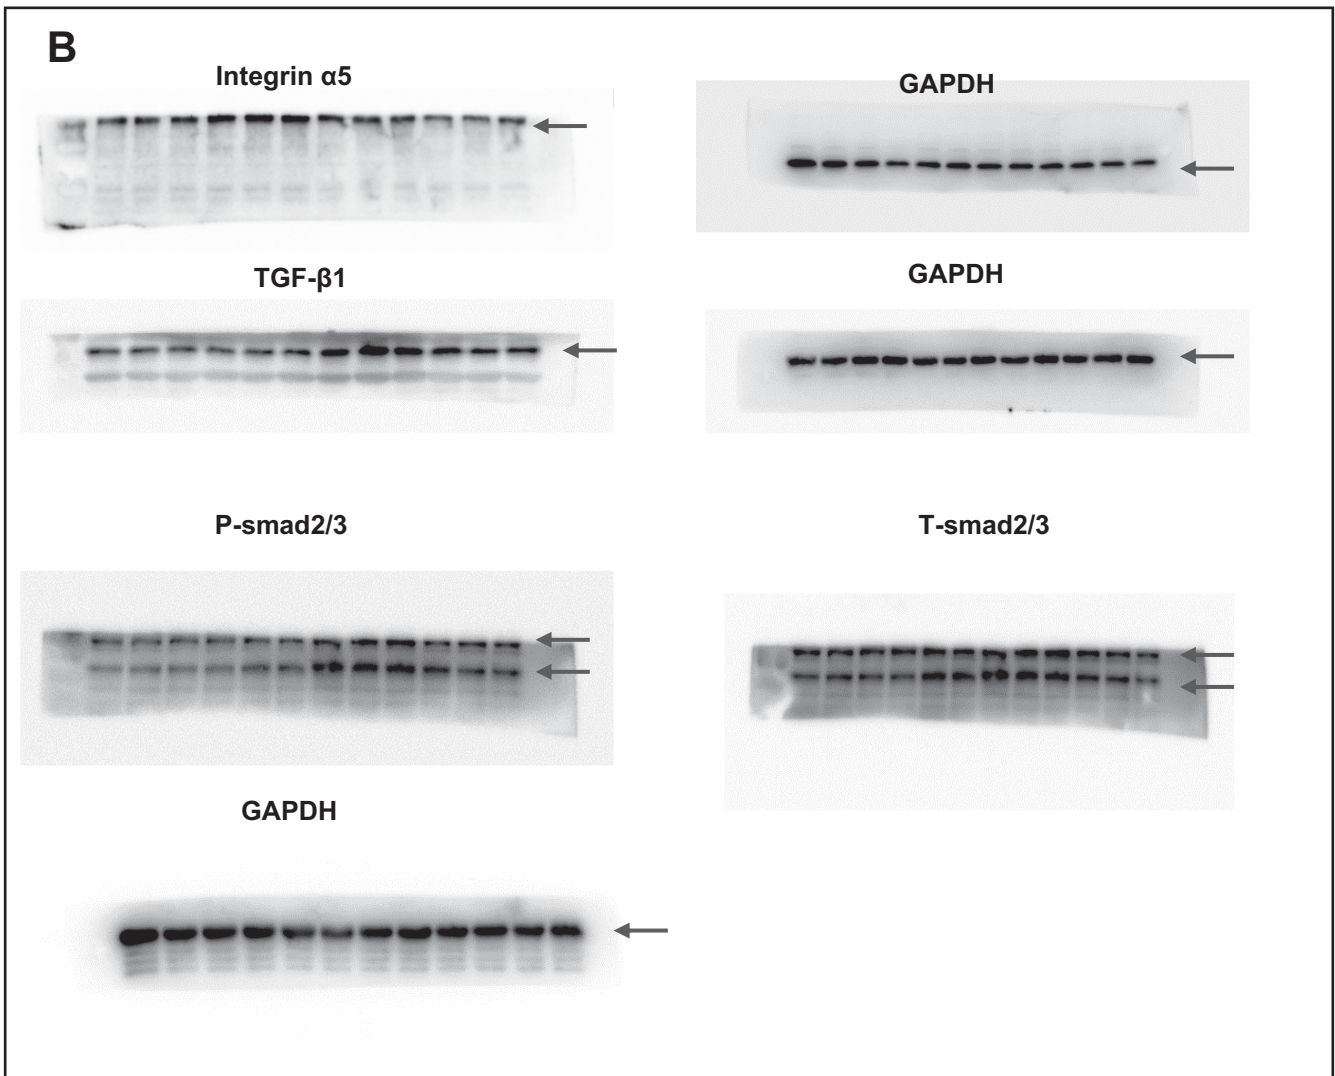

**NRVM media Sup Fig XA**

|                                                                       |                                                                                    |
|-----------------------------------------------------------------------|------------------------------------------------------------------------------------|
| <p>Full unedited gel for Alix,<br/>Supp. Figure X A</p>               | 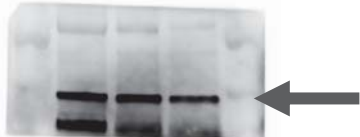 |
| <p>Full unedited gel for CD9,<br/>Supp. Figure X A</p>                |  |
| <p>Full unedited gel for CD63,<br/>Supp. Figure X A</p>               |  |
| <p>Full unedited gel for Cardiac<br/>Troponin T, Supp. Figure X A</p> |  |

**DotBlot Cardiac Evs Supp Fig XIIB**

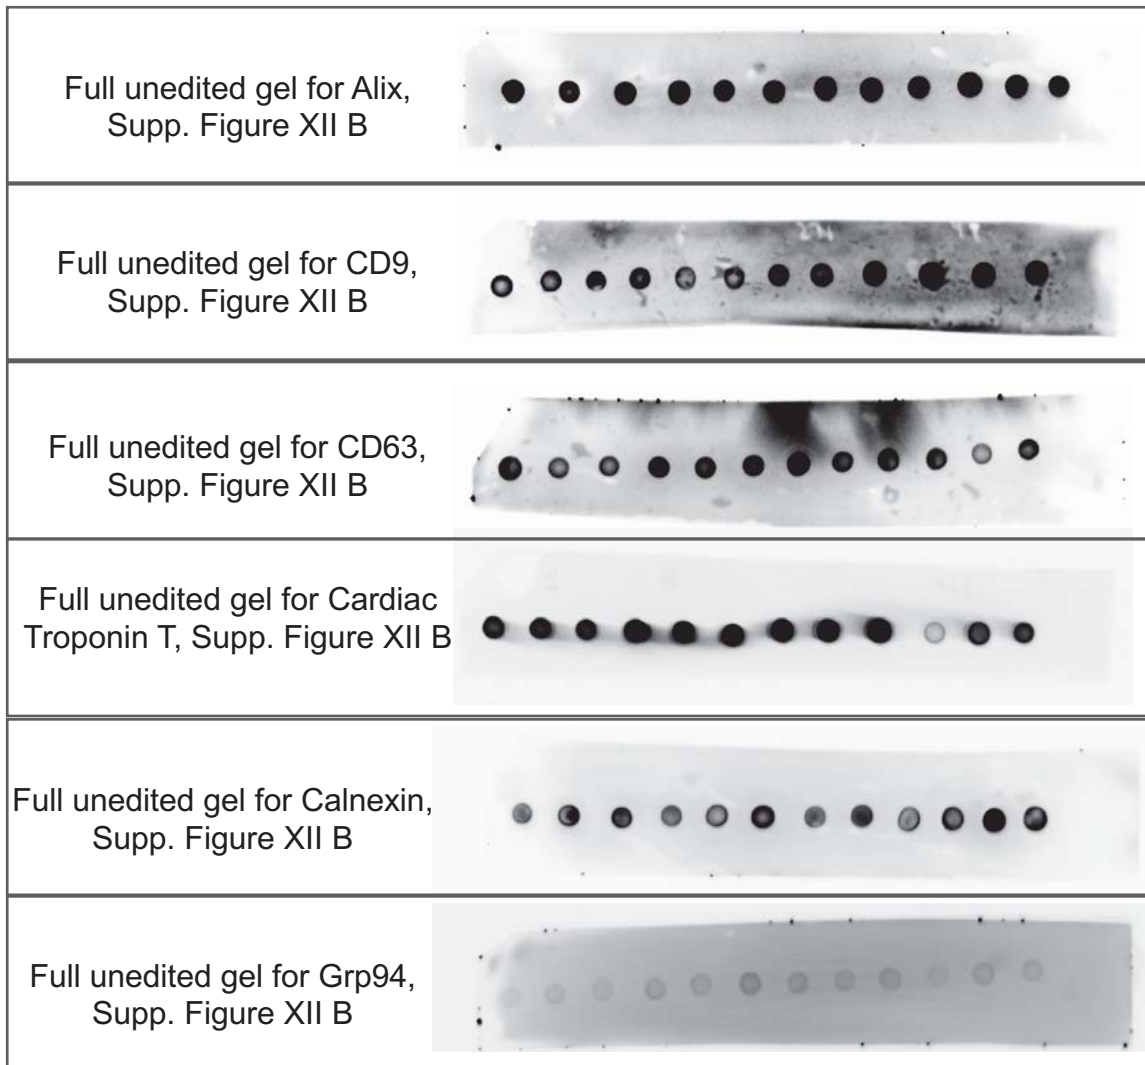

**aMHC-Cre mtmg plasma: Supp. Fig XIII**

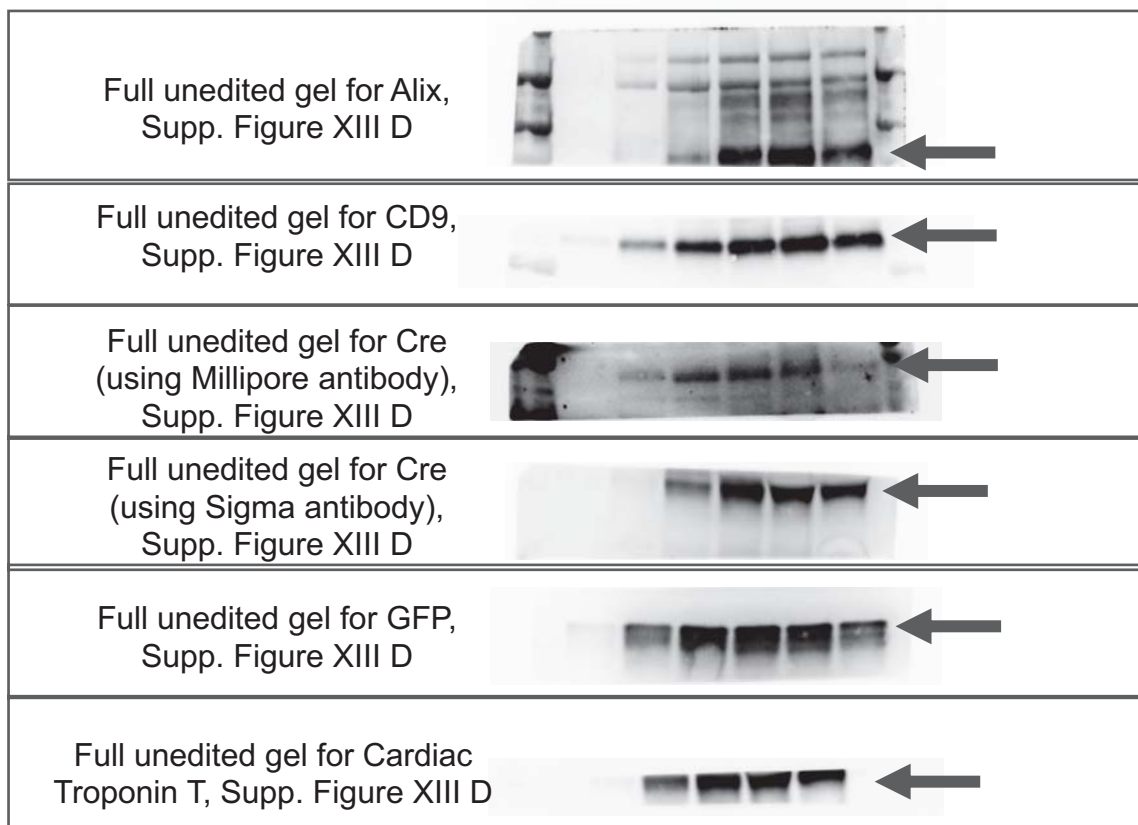

Supplement: NIHMS1640698-supplement-317244_Uncut_Gel_Blots.pdf [file NIHMS1640698-supplement-317244_Uncut_Gel_Blots.pdf]
