# Supplementary material
Source: PubMed Central journal article supplement (PMC7790887)
Supplement: NIHMS1640698-supplement-317244_Major_Resources_Table.pdf [file NIHMS1640698-supplement-317244_Major_Resources_Table.pdf]

## Major Resources Table

In order to allow validation and replication of experiments, all essential research materials listed in the Methods should be included in the Major Resources Table below. Authors are encouraged to use public repositories for protocols, data, code, and other materials and provide persistent identifiers and/or links to repositories when available. Authors may add or delete rows as needed.

### Animals (in vivo studies)

| Species | Vendor or Source   | Background Strain | Sex    | Persistent ID / URL |
|---------|--------------------|-------------------|--------|---------------------|
| Mouse   | Jackson Laboratory | C57BL/6           | Male   | 000664              |
| Rat     | Charles River      | Sprague Dawley    | Female | 400                 |

### Genetically Modified Animals

|                        | Species | Vendor or Source   | Background Strain                                                                          | Other Information | Persistent ID / URL |
|------------------------|---------|--------------------|--------------------------------------------------------------------------------------------|-------------------|---------------------|
| <b>Parent - Male</b>   | Mouse   | Jackson Laboratory | $\alpha$ MHC-MerCreMer<br>B6.FVB(129)-<br><i>A1cfTg(Myh6-cre/Esr1*)1Jmk/J</i>              |                   | 005657              |
| <b>Parent - Female</b> | Mouse   | Jackson Laboratory | <i>Rosa<sup>mTmG</sup></i><br><i>Gt(ROSA)26Sor<sup>tm4</sup>(ACTB-tdTomato,-EGFP)Luo/J</i> |                   | 007576              |

### Antibodies

| Target antigen      | Vendor or Source          | Catalog #  | Working concentration      | Lot # (preferred but not required) | Persistent ID / URL |
|---------------------|---------------------------|------------|----------------------------|------------------------------------|---------------------|
| GFP                 | Biomatik                  | CAU29134   | 1:250 (IF),<br>1:1000 (WB) |                                    |                     |
| Vimentin            | BioLegend                 | 699301     | 1:250 (IF)                 |                                    |                     |
| $\alpha$ -actinin   | Sigma-Aldrich             | A5044      | 1:250 (IF)                 |                                    |                     |
| $\alpha$ -actinin   | Sigma-Aldrich             | A7811      | 1:250 (IF)                 |                                    |                     |
| Cardiac Troponin I  | Abcam                     | Ab47003    | 1:1000 (IF)                |                                    |                     |
| BAX                 | Cell Signaling Technology | 2772       | 1:1000 (WB)                |                                    |                     |
| BCL-2               | Santa Cruz Biotechnology  | sc-7382    | 1:1000 (WB)                |                                    |                     |
| Cleaved Caspase-3   | Cell Signaling Technology | 9664       | 1:1000 (WB)                |                                    |                     |
| Caspase-3           | Cell Signaling Technology | 9662       | 1:1000 (WB)                |                                    |                     |
| MAP4K4              | Proteintech               | 55247-1-AP | 1:1000 (WB)                |                                    |                     |
| Integrin $\alpha$ 5 | Santa Cruz Biotechnology  | sc-166665  | 1:1000 (WB)                |                                    |                     |
| TGF $\beta$ 1       | Thermo Fisher Scientific  | MA5-15065  | 1:1000 (WB)                |                                    |                     |
| TGF $\beta$ 1       | Cell Signaling Technology | 3711       | 1:1000 (WB)                |                                    |                     |

|                          |                           |                |                                 |  |  |
|--------------------------|---------------------------|----------------|---------------------------------|--|--|
| p-Smad2/3                | Cell Signaling Technology | 8828           | 1:1000 (WB)                     |  |  |
| Smad2/3                  | Cell Signaling Technology | 8685           | 1:1000 (WB)                     |  |  |
| α-SMA                    | Sigma-Aldrich             | A2547          | 1:1000 (WB)                     |  |  |
| GAPDH                    | Cell Signaling Technology | 2118           | 1:1000 (WB)                     |  |  |
| Secondary HRP-antibodies | Agilent                   | P0448<br>P0447 | 1:5000 (WB)                     |  |  |
| Anti-CD31-PE             | BioLegend                 | 102408         | 1:200 (FC)                      |  |  |
| anti-CD45-APC/Cy7        | BioLegend                 | 103116         | 1:200 (FC)                      |  |  |
| Anti-MEF-SK4-APC         | Miltenyi Biotec           | 130-102-900    | 1:50 (FC)                       |  |  |
| Alix                     | BioLegend                 | 634501         | 1:1000 (WB)<br>1:250 (Dot blot) |  |  |
| Alix                     | Cell Signaling Technology | 92880S         | 1:1000 (WB)                     |  |  |
| CD9                      | BioLegend                 | 124802         | 1:1000 (WB)                     |  |  |
| CD9                      | Novus Biologicals         | NBP2-67310     | 1:1000 (WB)                     |  |  |
| CD63                     | Novus Biologicals         | NBP2-68077     | 1:1000 (WB)                     |  |  |
| CD63                     | Millipore-Sigma           | SAB4301607     | 1:1000 (WB)                     |  |  |
| Calnexin                 | Novus Biologicals         | NB300-518      | 1:1000 (Dot blot)               |  |  |
| Grp94                    | Cell Signaling Technology | 2104T          | 1:1000 (Dot blot)               |  |  |
| Cardiac Troponin T       | Thermo Fisher Scientific  | MA5-12960      | 1:1000 (WB)                     |  |  |
| Cre                      | Sigma Millipore           | 69050          | 1:1000 (WB)                     |  |  |
| Cre                      | Sigma Aldrich             | C7988          | 1:1000 (WB)                     |  |  |
| Ago2                     | Abcam                     | ab57113        |                                 |  |  |
| Ago2                     | Sigma-Aldrich             | SAB4200085     | 0.5g/mL (Dot blot)              |  |  |
| ApoB                     | Novus Biologicals         | NB200-527      | 1:1000 (Dot blot)               |  |  |
| ApoE                     | Santa Cruz                | Sc-13521       | 1:200 (Dot blot)                |  |  |
| ApoA1                    | Thermo Fisher Scientific  | MA515391       | 1:500 (Dot blot)                |  |  |
|                          |                           |                |                                 |  |  |

#### DNA/cDNA Clones

| Clone Name | Sequence | Source / Repository | Persistent ID / URL |
|------------|----------|---------------------|---------------------|
|            |          |                     |                     |

DOI [to be added]

|  |  |  |  |
|--|--|--|--|
|  |  |  |  |
|  |  |  |  |

### Cultured Cells

| Name                              | Vendor or Source                   | Sex (F, M, or unknown) | Persistent ID / URL |
|-----------------------------------|------------------------------------|------------------------|---------------------|
| HEK293 cells                      | ATCC                               | unknown                | CRL-1573            |
| Neonatal rat ventricular myocytes | Primary cells from neonatal hearts | both                   | N/A                 |
| Neonatal rat cardiac fibroblasts  | Primary cells from neonatal hearts | both                   | N/A                 |
| Adult mouse cardiac fibroblasts   | Primary cells from adult hearts    | Male                   | N/A                 |

### Data & Code Availability

| Description                                                                                     | Source / Repository | Persistent ID / URL   |
|-------------------------------------------------------------------------------------------------|---------------------|-----------------------|
| MicroRNA-30d is a biomarker for heart failure and plays a functional role in cardiac remodeling | SRA database        | Accession PRJNA529610 |

### Other

| Description                                                    | Source / Repository      | Persistent ID / URL |
|----------------------------------------------------------------|--------------------------|---------------------|
| Tamoxifen                                                      | Sigma                    | T5648               |
| miR-30d agomiR                                                 | RiboBio                  |                     |
| LNA anti-miR-30d                                               | Qiagen                   | YI04100903          |
| <i>Map4k4</i> siRNA                                            | Sigma                    | EMU076381           |
| Click-iT™ Plus TUNEL Assay for In Situ Apoptosis Detection     | Thermo Fisher Scientific | C10618              |
| In-Situ Cell Death Detection Kit                               | Sigma-Aldrich            | 12156792910         |
| In-Situ Cell Death Detection Kit                               | Vazyme                   |                     |
| Triphenyltetrazolium chloride                                  | Sigma                    | T8877               |
| miR-30d mimic                                                  | Thermo Fisher Scientific | 4464066             |
| AllStars Negative Control siRNA                                | Qiagen                   | 1022076             |
| TGFβ1                                                          | Thermo Fisher Scientific | PHG9204             |
| Angiotensin II                                                 | Sigma                    | A9525               |
| Cell-Light™ EdU Apollo®488 In Vitro Imaging Kit                | Ribobio                  | C10310-3            |
| miRcury total RNA isolation kit                                | Exiqon                   | 300111              |
| exoRNeasy kit                                                  | Qiagen                   | 77044               |
| Alexa 647 conjugated anti-miR-30d molecular beacon             | PNA Bio                  |                     |
| LIVE/DEAD™ Fixable Blue Dead Cell Stain Kit, for UV excitation | Thermo Fisher Scientific | L34961              |
| Fc Block                                                       | BD Biosciences           | 553142              |
